# Supplementary material for: Focal Serous Tubal Intra-Epithelial Carcinoma Lesions Are Associated With Global Changes in the Fallopian Tube Epithelia and Stroma
Source: PubMed Central journal article supplement (PMC8977528; doi:10.3389/fonc.2022.853755), 2022-03-21
Supplement: DataSheet_1.pdf [file DataSheet_1.pdf]

**Supplementary Table 1. Characteristics of patients whose fimbria region of the fallopian tube was examined.**

| Characteristic       | Benign<br>n=39 | NoSTIC<br>n=13 | STIC<br>n=25 | P value              |                    |                    |
|----------------------|----------------|----------------|--------------|----------------------|--------------------|--------------------|
|                      |                |                |              | NoSTIC vs.<br>Benign | STIC vs.<br>Benign | STIC vs.<br>NoSTIC |
| <b>Age in years</b>  |                |                |              |                      |                    |                    |
| Median (range)       | 56 (46-87)     | 65 (37-82)     | 58 (46-91)   | NS <sup>a</sup>      | NS <sup>a</sup>    | NS <sup>a</sup>    |
| <b>Menopause</b>     |                |                |              |                      |                    |                    |
| Premenopausal        | 9 (23.1%)      | 2 (15.4%)      | 0 (0%)       | NS <sup>b</sup>      | 0.009 <sup>b</sup> | NS <sup>b</sup>    |
| Postmenopausal       | 30 (76.9%)     | 11 (84.6%)     | 25 (100%)    |                      |                    |                    |
| <b>Chemotherapy</b>  |                |                |              |                      |                    |                    |
| Unknown              | 3 (7.7%)       | 6 (46.2%)      | 3 (12%)      | <0.0001 <sup>b</sup> | 0.021 <sup>b</sup> | 0.045 <sup>b</sup> |
| No                   | 34 (87.2%)     | 3 (23.1%)      | 15 (60%)     |                      |                    |                    |
| Yes                  | 2 (5.1%)       | 4 (30.7%)      | 7 (28%)      |                      |                    |                    |
| <b>BRCA Mutation</b> |                |                |              |                      |                    |                    |
| Not tested           | 5 (12.8%)      | 7 (53.8%)      | 5 (20%)      | 0.002 <sup>b</sup>   | NS <sup>b</sup>    | 0.046 <sup>b</sup> |
| Negative             | 8 (20.5%)      | 4 (30.8%)      | 7 (28%)      |                      |                    |                    |
| Positive             | 26 (66.7%)     | 2 (15.4%)      | 13 (52%)     |                      |                    |                    |

Statistical tests were performed with a Kruskal-Wallis test<sup>a</sup> or a Fisher's Exact Test<sup>b</sup>. Values are considered significant if  $P < 0.05$ . Age is expressed as a median (interquartile range). Menopause, chemotherapy, and BRCA mutations were expressed as percentiles.

Benign: Normal fallopian tubes from prophylactic surgeries or benign conditions from women without STIC or cancer.

NoSTIC: Fallopian tubes from women who have ovarian cancer but the examined fallopian tubes do not contain transformed cells.

STIC: Fallopian tubes with STIC lesions from women who have ovarian cancer. NS, not significant.

**Supplementary Table 2. Characteristics of patients whose ampulla region of the fallopian tube was examined.**

| Characteristic       | Benign<br>n=15 | NoSTIC<br>n=13 | STIC<br>n=13 | P value              |                    |                    |
|----------------------|----------------|----------------|--------------|----------------------|--------------------|--------------------|
|                      |                |                |              | NoSTIC vs.<br>Benign | STIC vs.<br>Benign | STIC vs.<br>NoSTIC |
| <b>Age in years</b>  |                |                |              |                      |                    |                    |
| Median (range)       | 63 (48-87)     | 64 (37-82)     | 64 (51-75)   | NS <sup>a</sup>      | NS <sup>a</sup>    | NS <sup>a</sup>    |
| <b>Menopause</b>     |                |                |              |                      |                    |                    |
| Premenopausal        | 0 (0%)         | 3 (23.1%)      | 0 (0%)       | NS <sup>b</sup>      | NS <sup>b</sup>    | NS <sup>b</sup>    |
| Postmenopausal       | 15 (100%)      | 10 (76.9%)     | 13 (100%)    |                      |                    |                    |
| <b>Chemotherapy</b>  |                |                |              |                      |                    |                    |
| Unknown              | 3 (20%)        | 8 (61.5%)      | 3 (23.1%)    | 0.001 <sup>b</sup>   | NS <sup>b</sup>    | NS <sup>b</sup>    |
| No                   | 12 (80%)       | 2 (15.4%)      | 6 (46.2%)    |                      |                    |                    |
| Yes                  | 0 (0%)         | 3 (23.1%)      | 4 (30.7%)    |                      |                    |                    |
| <b>BRCA Mutation</b> |                |                |              |                      |                    |                    |
| Not tested           | 4 (26.7%)      | 8 (61.5%)      | 4 (30.8%)    | NS <sup>b</sup>      | NS <sup>b</sup>    | NS <sup>b</sup>    |
| Negative             | 4 (26.7%)      | 3 (23.1%)      | 5 (38.4%)    |                      |                    |                    |
| Positive             | 7 (46.6%)      | 2 (15.4%)      | 4 (30.8%)    |                      |                    |                    |

Statistical tests were performed with a Kruskal-Wallis test<sup>a</sup> or a Fisher's Exact Test<sup>b</sup>. Values are considered significant if  $P < 0.05$ . Age is expressed as a median (interquartile range). Menopause, chemotherapy, and BRCA mutations were expressed as percentiles.

Benign: Normal fallopian tubes from prophylactic surgeries or benign conditions from women without STIC or cancer.

NoSTIC: Fallopian tubes from women who have ovarian cancer but the examined fallopian tube do not contain transformed cells.

STIC: Fallopian tubes with STIC lesions from women who have ovarian cancer. NS, not significant.

**Supplementary Table 3. Multivariable linear regression analysis showing histopathologic characteristics of fallopian tubes with or without STIC lesions in the fimbria region.**

| Characteristics                                       | Model 1        | Model 2        | Model 3        |
|-------------------------------------------------------|----------------|----------------|----------------|
|                                                       | <i>P</i> Value | <i>P</i> Value | <i>P</i> Value |
| <b>Number of SCE/total number of epithelial cells</b> |                |                |                |
| STIC vs Benign                                        | 0.002          | 0.049          | 0.045          |
| STIC vs NoSTIC                                        | 0.028          | 0.030          | 0.021          |
| <b>Number of CCE/total number of epithelial cells</b> |                |                |                |
| STIC vs Benign                                        | 0.038          | 0.002          | <0.001         |
| STIC vs NoSTIC                                        | NS             | NS             | NS             |
| <b>Number of secretory cells within SCE</b>           |                |                |                |
| STIC vs Benign                                        | <0.0001        | <0.0001        | <0.0001        |
| STIC vs NoSTIC                                        | <0.0001        | 0.001          | 0.001          |
| <b>Number of ciliated cells within CCE</b>            |                |                |                |
| STIC vs Benign                                        | NS             | NS             | NS             |
| STIC vs NoSTIC                                        | NS             | NS             | NS             |

Model 1 was used for comparisons of the characteristics of the Benign, STIC, and NoSTIC groups using the log-transformed values. The multiple linear regression Model 2 included Model 1 plus the potential confounders of menopause, chemotherapy, and BRCA mutations. The multiple linear regression Model 3 included Model 2 plus age as a potential confounder. Values were considered significant if  $P < 0.05$ . SCE, secretory cell expansion; CCE, ciliated cell expansion; NS, not significant.

**Supplementary Table 4. Multivariable linear regression analysis showing histopathologic characteristics of fallopian tubes with or without STIC lesions in the ampulla region.**

| Characteristics                                       | Model 1<br><i>P</i> Value | Model 2<br><i>P</i> Value | Model 3<br><i>P</i> Value |
|-------------------------------------------------------|---------------------------|---------------------------|---------------------------|
| <b>Number of SCE/total number of epithelial cells</b> |                           |                           |                           |
| STIC vs Benign                                        | NS                        | NS                        | NS                        |
| STIC vs NoSTIC                                        | NS                        | NS                        | NS                        |
| <b>Number of CCE/total number of epithelial cells</b> |                           |                           |                           |
| STIC vs Benign                                        | NS                        | NS                        | NS                        |
| STIC vs NoSTIC                                        | NS                        | NS                        | NS                        |
| <b>Number of secretory cells within SCE</b>           |                           |                           |                           |
| STIC vs Benign                                        | <0.001                    | <0.001                    | <0.001                    |
| STIC vs NoSTIC                                        | 0.003                     | 0.021                     | 0.030                     |
| <b>Number of ciliated cells within CCE</b>            |                           |                           |                           |
| STIC vs Benign                                        | 0.043                     | 0.028                     | 0.016                     |
| STIC vs NoSTIC                                        | NS                        | 0.025                     | 0.035                     |

Model 1 was used for comparisons of the characteristics of the Benign, STIC, and NoSTIC groups using the log-transformed values. The multiple linear regression Model 2 included Model 1 plus the potential confounders of menopause, chemotherapy, and BRCA mutations. The multiple linear regression Model 3 included Model 2 plus age as a potential confounder. Values were considered significant if  $P < 0.05$ . SCE, secretory cell expansion; CCE, ciliated cell expansion; NS, not significant.
